# Supplementary material for: Human CYP2B6 produces oxylipins from polyunsaturated fatty acids and reduces diet-induced obesity
Source: PubMed Central journal article supplement (PMC9754190; doi:10.1371/journal.pone.0277053), 2022-12-15
Supplement: pone.0277053.s001.pdf [file pone.0277053.s001.pdf]

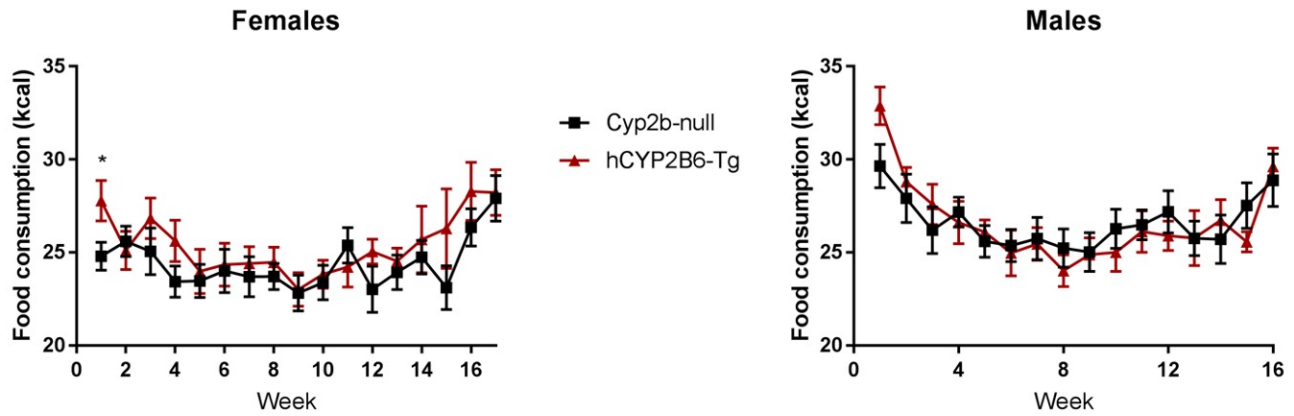

**Supplementary File 1. Feed consumption of Cyp2b-null and hCYP2B6-Tg mice during 16-weeks of high-fat diet treatment.** Female and male feed consumption was measured by weighing the food every alternate day. Data are presented as mean calories  $\pm$  SEM. Statistical significance was determined by unpaired Student's t-tests (n=8). \* indicates a p-value < 0.05.
