# Supplementary material for: Human CYP2B6 produces oxylipins from polyunsaturated fatty acids and reduces diet-induced obesity
Source: PubMed Central journal article supplement (PMC9754190; doi:10.1371/journal.pone.0277053), 2022-12-15
Supplement: pone.0277053.s002.pdf [file pone.0277053.s002.pdf]

**Suppl File 2. Comparison of tissue weights between Cyp2b-null and hCYP2B6-Tg female (A) and male (B) mice fed a HFD for 16 weeks.**

**A.**

| <b>Tissue Weights</b> | <b>Cyp2b-null F</b> | <b>hCYP2B6-Tg F</b> |
|-----------------------|---------------------|---------------------|
| <b>Total Body</b>     | 29.63 ± 1.40        | 27.05 ± 1.21        |
| <b>Liver</b>          | 1.02 ± 0.03         | 0.99 ± 0.04         |
| <b>Kidney</b>         | 0.33 ± 0.01         | 0.29 ± 0.01*        |
| <b>WAT</b>            | 2.25 ± 0.33         | 1.65 ± 0.31         |
| <b>BAT</b>            | 0.13 ± 0.02         | 0.12 ± 0.01         |

**B.**

| <b>Tissue Weights</b> | <b>Cyp2b-null M</b> | <b>hCYP2B6-Tg M</b> |
|-----------------------|---------------------|---------------------|
| <b>Total Body</b>     | 38.81 ± 1.99        | 38.93 ± 1.66        |
| <b>Liver</b>          | 1.40 ± 0.13         | 1.51 ± 0.07         |
| <b>Kidney</b>         | 0.48 ± 0.04         | 0.52 ± 0.02         |
| <b>WAT</b>            | 3.41 ± 0.07         | 3.52 ± 0.33         |
| <b>BAT</b>            | 0.31 ± 0.03         | 0.29 ± 0.07         |
| <b>Testes</b>         | 0.33 ± 0.03         | 0.38 ± 0.03         |

Data are presented as mean (g) ± SEM. Statistical significance was determined by unpaired Student's t-tests (n=7-8). \* indicates a p-value < 0.05.
