# Supplementary material for: Human CYP2B6 produces oxylipins from polyunsaturated fatty acids and reduces diet-induced obesity
Source: PubMed Central journal article supplement (PMC9754190; doi:10.1371/journal.pone.0277053), 2022-12-15
Supplement: pone.0277053.s003.pdf [file pone.0277053.s003.pdf]

**Suppl File 3. Comparison of serum biomarkers between Cyp2b-null and hCYP2B6-Tg female (A) and male (B) mice fed a HFD for 16 weeks.**

**A.**

| <b>Serum Biomarkers</b> | <b>Cyp2b-null F</b> | <b>hCYP2B6-Tg F</b> |
|-------------------------|---------------------|---------------------|
| <b>ALT</b>              | 21.76 ± 2.02        | 18.81 ± 1.14        |
| <b>Triglycerides</b>    | 87.53 ± 15.68       | 71.33 ± 12.36       |
| <b>HDL</b>              | 74.37 ± 2.88        | 75.26 ± 1.78        |
| <b>LDL</b>              | 6.75 ± 0.46         | 7.59 ± 0.29         |
| <b>VLDL</b>             | 17.51 ± 3.14        | 14.27 ± 2.47        |
| <b>Cholesterol</b>      | 133.24 ± 7.44       | 127.82 ± 4.05       |

**B.**

| <b>Serum Biomarkers</b> | <b>Cyp2b-null M</b> | <b>hCYP2B6-Tg M</b> |
|-------------------------|---------------------|---------------------|
| <b>ALT</b>              | 40.02 ± 15.89       | 30.65 ± 7.51        |
| <b>Triglycerides</b>    | 88.06 ± 9.61        | 79.25 ± 7.31        |
| <b>HDL</b>              | 100.76 ± 3.03       | 98.70 ± 1.76        |
| <b>LDL</b>              | 10.90 ± 0.76        | 10.97 ± 0.76        |
| <b>VLDL</b>             | 17.61 ± 1.92        | 15.85 ± 1.46        |
| <b>Cholesterol</b>      | 213.71 ± 6.18       | 200.52 ± 6.56       |

Data are presented as mean (g) ± SEM. Statistical significance was determined by unpaired Student's t-tests (n=5).
