# Supplementary material for: Human CYP2B6 produces oxylipins from polyunsaturated fatty acids and reduces diet-induced obesity
Source: PubMed Central journal article supplement (PMC9754190; doi:10.1371/journal.pone.0277053), 2022-12-15
Supplement: pone.0277053.s004.pdf [file pone.0277053.s004.pdf]

**Suppl File 4. Total average of oxylipin metabolites measured in liver and serum of HFD-fed Cyp2b-null and hCYP2B6-Tg mice.**

|                | Serum      |            | Liver      |            |
|----------------|------------|------------|------------|------------|
|                | Cyp2b-null | hCYP2B6-Tg | Cyp2b-null | hCYP2B6-Tg |
| <b>Females</b> | 0.002521 ± | 0.003214 ± | 0.007582 ± | 0.004072 ± |
|                | 0.0005892  | 0.0007361  | 0.001603   | 0.000926   |
| <b>Males</b>   | 0.002238 ± | 0.005842 ± | 0.002008 ± | 0.004106 ± |
|                | 0.0005311  | 0.002113   | 0.0004811  | 0.0008813* |

Data are presented as mean (ng/μL) ± SEM. Statistical significance was determined by unpaired Student's t-tests (n=5). \* indicates a p-value < 0.05.
