# Supplementary material for: Human CYP2B6 produces oxylipins from polyunsaturated fatty acids and reduces diet-induced obesity
Source: PubMed Central journal article supplement (PMC9754190; doi:10.1371/journal.pone.0277053), 2022-12-15
Supplement: pone.0277053.s005.pdf [file pone.0277053.s005.pdf]

**Suppl File 5 Measured serum and liver lipid metabolite concentrations in Cyp2b-null and hCYP2B6-Tg female (A) and male (B) mice fed a HFD for 16 weeks.**

**A.**

| Oxylipin Species       | Serum       |             | Liver            |             |
|------------------------|-------------|-------------|------------------|-------------|
|                        | Cyp2b-null  | hCYP2B6-Tg  | Cyp2b-null       | hCYP2B6-Tg  |
| <b>AA 14,15-EET</b>    | 3.444E-06 ± | 2.909E-05 ± | 0.0008699 ±      | 0.0003727 ± |
|                        | 2.11E-06    | 2.946E-06** | 0.0004062        | 0.000219    |
| <b>AA 11,12-EET</b>    | 0.001911 ±  | 0.002914 ±  | 0.007769 ±       | 0.003422 ±  |
|                        | 0.0003876   | 0.001033    | 0.002561         | 0.001977    |
| <b>AA 9-HETE</b>       | 0.008382 ±  | 0.007522 ±  | 0.01077 ±        | 0.006018 ±  |
|                        | 0.005741    | 0.003799    | 0.005417         | 0.002752    |
| <b>AA 12-HETE</b>      | 0.0004833 ± | 0.001130 ±  | 0.002732 ±       | 0.001756 ±  |
|                        | 9.685E-05   | 0.0003599   | 0.0008528        | 0.001041    |
| <b>AA 11,12-DHET</b>   | 0.01543 ±   | 0.02971 ±   | 0.02317 ±        | 0.01133 ±   |
|                        | 0.003179    | 0.006977    | 0.009411         | 0.00699     |
| <b>AA PGE2</b>         | 0.0047044 ± | 0 ± 0*      | 0.0002838 ±      | 0 ± 0       |
|                        | 0.001773    |             | 0.0002838        |             |
| <b>AA PGF2a</b>        | 0.003416 ±  | 0.005472 ±  | 0.04234 ±        | 0.02244 ±   |
|                        | 0.0008837   | 0.001738    | 0.02609          | 0.01324     |
| <b>AA TXB2</b>         | 6.141E-05 ± | 0.0001025 ± | 0.001356 ±       | 0.0006450 ± |
|                        | 2.902E-05   | 4.572E-05   | 0.000447         | 0.0004188   |
| <b>LA 9-HODE</b>       | 0.001124 ±  | 0.004251 ±  | 0.03462 ± 0.0141 | 0.01603 ±   |
|                        | 0.0001462   | 0.0009221*  |                  | 0.009448    |
| <b>LA 9-HpODE</b>      | 0.02914 ±   | 0.02957 ±   | 0.03637 ±        | 0.03278 ±   |
|                        | 0.002886    | 0.004296    | 0.01197          | 0.004932    |
| <b>LA 13-KODE</b>      | 0.0003835 ± | 0.001051 ±  | 0.007301 ±       | 0.002536 ±  |
|                        | 6.357E-05   | 0.0001858** | 0.00389          | 0.001444    |
| <b>LA 9,10-DiHOME</b>  | 9.894E-05 ± | 0.000345 ±  | 0.002194 ±       | 0.0008417 ± |
|                        | 4.307E-05   | 8.309E-05*  | 0.0008728        | 0.0005167   |
| <b>EPA Resolvin</b>    | 0.002928 ±  | 0.004320 ±  | 0.0007463 ±      | 0.0003922 ± |
|                        | 0.0001994   | 0.0006148   | 0.0004635        | 0.0002707   |
| <b>ALA 9-HOTrE</b>     | 0 ± 0       | 0.0001253 ± | 0.0006108 ±      | 0.0002325 ± |
|                        |             | 0.0001253   | 0.0002531        | 0.0002325   |
| <b>ALA Isoprostane</b> | 0 ± 0       | 0.0002449 ± | 0.008005 ±       | 0.003327 ±  |
|                        |             | 6.423E-05** | 0.003746         | 0.001886    |

**B.**

| Oxylipin Species       | Serum                    |                           | Liver                    |                          |
|------------------------|--------------------------|---------------------------|--------------------------|--------------------------|
|                        | Cyp2b-null               | hCYP2B6-Tg                | Cyp2b-null               | hCYP2B6-Tg               |
| <b>AA 14,15-EET</b>    | 1.281E-05 ±<br>4.445E-06 | 3.707E-05 ±<br>2.216E-05  | 8.732E-05 ±<br>2.825E-05 | 0.0003897 ±<br>0.0002161 |
| <b>AA 11,12-EET</b>    | 0.002183 ±<br>0.0006091  | 0.006343 ±<br>0.003742    | 0.0009780 ±<br>0.0003435 | 0.004964 ±<br>0.002834   |
| <b>AA 9-HETE</b>       | 0.003868 ±<br>0.001342   | 0.01030 ±<br>0.003904     | 0.006016 ±<br>0.001504   | 0.01118 ±<br>0.003558    |
| <b>AA 12-HETE</b>      | 0.0004491 ±<br>0.0001189 | 0.002130 ±<br>0.001214    | 0.0006437 ±<br>0.000258  | 0.002592 ±<br>0.001547   |
| <b>AA 11,12-DHET</b>   | 0.01763 ±<br>0.00509     | 0.04130 ±<br>0.02508      | 0.002351 ±<br>0.001458   | 0.01177 ±<br>0.006342    |
| <b>AA PGE2</b>         | 0.002081 ±<br>0.0008876  | 0.002618 ±<br>0.001158    | 0.0004154 ±<br>0.0004154 | 0 ± 0                    |
| <b>AA PGF2a</b>        | 0.001286 ±<br>0.0008909  | 0.007236 ±<br>0.003804    | 0.005866 ±<br>0.002478   | 0.02343 ±<br>0.01314     |
| <b>AA TXB2</b>         | 0 ± 0                    | 0.0001574 ±<br>5.767E-05* | 0.0002758 ±<br>0.0001044 | 0.00140 ±<br>0.0008361   |
| <b>LA 9-HODE</b>       | 0.001534 ±<br>0.0005044  | 0.004277 ±<br>0.00226     | 0.004474 ±<br>0.001505   | 0.01805 ±<br>0.01013     |
| <b>LA 9-HpODE</b>      | 0.02545 ±<br>0.002158    | 0.02385 ±<br>0.007709     | 0.02616 ±<br>0.00340     | 0.02363 ±<br>0.004619    |
| <b>LA 13-KODE</b>      | 0.0005594 ±<br>0.0001023 | 0.001398 ±<br>0.0008135   | 0.0006725 ±<br>0.0001771 | 0.002463 ±<br>0.001289   |
| <b>LA 9,10-DiHOME</b>  | 9.070E-05 ±<br>4.131E-05 | 0.0002486 ±<br>0.0001336  | 0.0003869 ±<br>0.000138  | 0.001156 ±<br>0.0006744  |
| <b>EPA Resolvin</b>    | 0.003274 ±<br>0.000697   | 0.003091 ±<br>0.0008124   | 0 ± 0                    | 0 ± 0                    |
| <b>ALA 9-HOTrE</b>     | 0 ± 0                    | 0 ± 0                     | 0 ± 0                    | 0.0004337 ±<br>0.000286  |
| <b>ALA Isoprostane</b> | 0.0001335 ±<br>5.946E-05 | 0.0003280 ±<br>0.000126   | 0.0008786 ±<br>0.000269  | 0.003881 ±<br>0.002122   |

Data are presented as mean (ng/μL) ± SEM. Statistical significance was determined by unpaired Student's t-tests (n=5). \* indicates a p-value < 0.05 and \*\* indicates a p-value < 0.01.
