# Supplementary material for: Human CYP2B6 produces oxylipins from polyunsaturated fatty acids and reduces diet-induced obesity
Source: PubMed Central journal article supplement (PMC9754190; doi:10.1371/journal.pone.0277053), 2022-12-15

**Suppl File 6: Graphical representation of increased oxylipins in serum of female HFD-fed hCYP2b6-Tg mice**

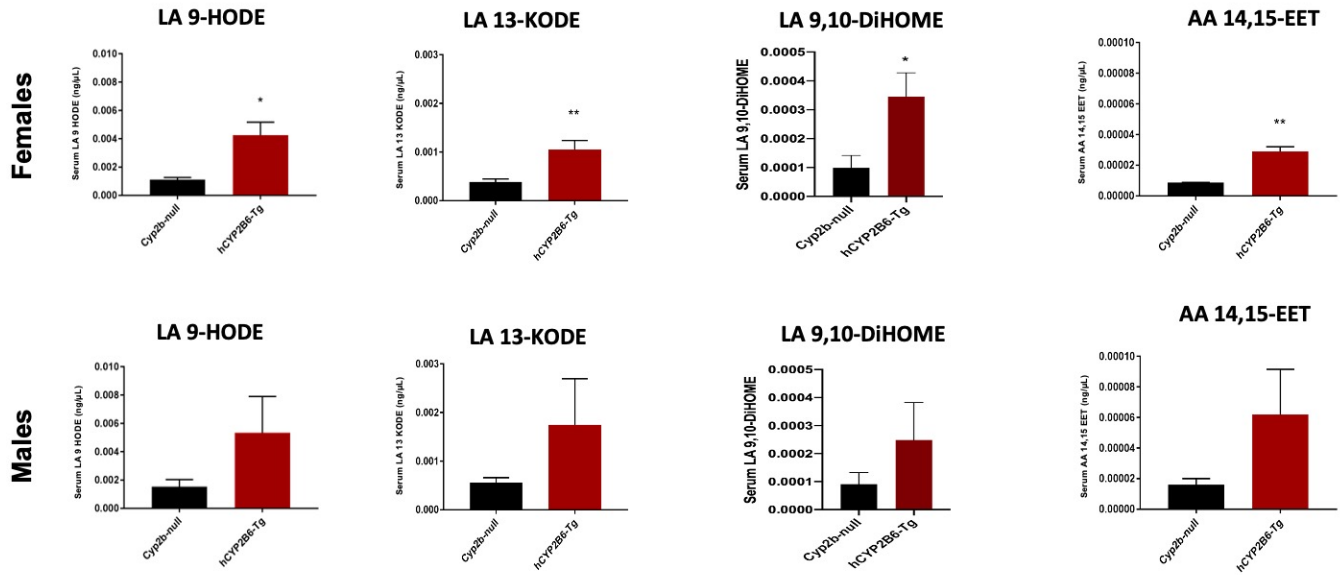

Supplement: pone.0277053.s006.pdf [file pone.0277053.s006.pdf]
